# Supplementary material for: Rapid Development of a Tool for Prioritizing Patients with Coronavirus Disease 2019 for Intensive Care
Source: PubMed Central journal article supplement — Crit Care Explor. 2021 Mar 12;3(3):e0368. doi: 10.1097/CCE.0000000000000368 (PMC7994037; doi:10.1097/cce.0000000000000368), 2021-03-12
Supplement: cc9-3-e0368-s002.pdf [file cc9-3-e0368-s002.pdf]

## Supplementary Table 2. Inclusion and exclusion criteria

|                                                                                                                                                                                                                                                                                                                                                                                                                                                                                                                                                                                                                                                                                                                                                                                                                                                                                                                                                                                                                                                                                                                                                                                                                                                                                                                                                                                                                                                                                                                                                                                                                                                                                                                                                                                                                                                                                                                                                                                       |
|---------------------------------------------------------------------------------------------------------------------------------------------------------------------------------------------------------------------------------------------------------------------------------------------------------------------------------------------------------------------------------------------------------------------------------------------------------------------------------------------------------------------------------------------------------------------------------------------------------------------------------------------------------------------------------------------------------------------------------------------------------------------------------------------------------------------------------------------------------------------------------------------------------------------------------------------------------------------------------------------------------------------------------------------------------------------------------------------------------------------------------------------------------------------------------------------------------------------------------------------------------------------------------------------------------------------------------------------------------------------------------------------------------------------------------------------------------------------------------------------------------------------------------------------------------------------------------------------------------------------------------------------------------------------------------------------------------------------------------------------------------------------------------------------------------------------------------------------------------------------------------------------------------------------------------------------------------------------------------------|
| <p><i>To be considered for ICU, the patient must satisfy at least one of these criteria:</i></p> <ul style="list-style-type: none"> <li>• Requires invasive ventilatory support <ul style="list-style-type: none"> <li>○ Refractory hypoxemia (<math>\text{SpO}_2 &lt; 90\%</math> on non-rebreather mask/<math>\text{FiO}_2 &gt; 0.85</math>)</li> <li>○ Respiratory acidosis with <math>\text{pH} &lt; 7.2</math></li> <li>○ Clinical evidence of impending respiratory failure</li> <li>○ Inability to protect or maintain airway</li> </ul> </li> </ul> <p>Or</p> <ul style="list-style-type: none"> <li>• Hypotension <ul style="list-style-type: none"> <li>○ <math>\text{SBP} &lt; 90</math> or relative hypotension with clinical evidence of shock (altered level of consciousness, decreased urine output, or other end organ failure) refractory to volume resuscitation, requiring vasopressor/inotrope support that cannot be managed elsewhere</li> </ul> </li> </ul>                                                                                                                                                                                                                                                                                                                                                                                                                                                                                                                                                                                                                                                                                                                                                                                                                                                                                                                                                                                                   |
| <p><i>To be excluded from ICU (i.e. unlikely to benefit), the patient must satisfy at least one of these criteria:</i></p> <ul style="list-style-type: none"> <li>• Age <math>&gt; 85</math> years</li> <li>• Cardiac arrest <ul style="list-style-type: none"> <li>○ Unwitnessed cardiac arrest</li> <li>○ Witnessed arrest non-responsive to electrical therapy</li> <li>○ Recurrent cardiac arrest</li> </ul> </li> <li>• Severe cognitive impairment</li> <li>• Advanced untreatable neuromuscular disease</li> <li>• Metastatic malignancy, if unstable or current chemotherapy</li> <li>• Advanced and irreversible immunocompromise</li> <li>• Severe and irreversible neurologic event/condition</li> <li>• End-stage organ failure: <ul style="list-style-type: none"> <li>○ Cardiac <ul style="list-style-type: none"> <li>▪ NYHA class III or IV heart failure</li> </ul> </li> <li>○ Lung <ul style="list-style-type: none"> <li>▪ COPD with <math>\text{FEV1} &lt; 25\%</math> predicted, baseline <math>\text{PaO}_2 &lt; 55\text{mg}</math>, or secondary pulmonary hypertension</li> <li>▪ CF with postbronchodilator <math>\text{FEV1} &lt; 30\%</math> predicted or baseline <math>\text{PaO}_2 &lt; 55\text{mg}</math></li> <li>▪ Pulmonary fibrosis with VC or TLC <math>&lt; 60\%</math> predicted, baseline <math>\text{PaO}_2 &lt; 55\text{mmHg}</math>, or secondary pulmonary hypertension</li> <li>▪ Primary pulmonary hypertension with NYHA class III-IV heart failure, or right atrial pressure <math>&gt; 10\text{mmHg}</math>, or mean pulmonary arterial pressure <math>&gt; 50\text{mmHg}</math></li> </ul> </li> <li>○ Liver <ul style="list-style-type: none"> <li>▪ Child Pugh Score <math>\geq 7</math></li> </ul> </li> </ul> </li> <li>• Has other severe conditions such as severe trauma, severe burns</li> <li>• Requires transfusion of <math>&gt; 6</math> units PRBC in 24-hour period</li> <li>• Elective palliative surgery</li> </ul> |

Adapted from: Christian M, Wax R, Lazar N. *Critical Care During a Pandemic: Final Report of the Ontario Health Plan for an Influenza Pandemic (OHP/IP) Working Group on Adult Critical Care Admission, Discharge and Triage Criteria*. Toronto, 2006.
