# Supplementary material for: Rapid Development of a Tool for Prioritizing Patients with Coronavirus Disease 2019 for Intensive Care
Source: PubMed Central journal article supplement — Crit Care Explor. 2021 Mar 12;3(3):e0368. doi: 10.1097/CCE.0000000000000368 (PMC7994037; doi:10.1097/cce.0000000000000368), 2021-03-12
Supplement: cc9-3-e0368-s003.pdf [file cc9-3-e0368-s003.pdf]

**Supplementary Table 3. Ranking of patient vignettes from applying the prioritization tool**

| <b>Patient</b>                                                           | <b>Rank</b>     | <b>Score</b> | <b>Age<br/>(independent<br/>of other<br/>criteria)</b> | <b>SOFA<br/>score</b>       | <b>BMI<br/>(independent<br/>of<br/>comorbidity<br/>and function)</b> | <b>Pre-existing<br/>cardiovascular<br/>conditions</b> | <b>Pre-<br/>existing<br/>respiratory<br/>conditions</b> | <b>Immuno-<br/>compromised</b> | <b>Other<br/>relevant<br/>medical<br/>conditions</b> | <b>Functional<br/>capacity</b> |
|--------------------------------------------------------------------------|-----------------|--------------|--------------------------------------------------------|-----------------------------|----------------------------------------------------------------------|-------------------------------------------------------|---------------------------------------------------------|--------------------------------|------------------------------------------------------|--------------------------------|
| <i>C</i> : 39-year-old man with recent thyrotoxic cardiomyopathy: SOFA 8 | 1 <sup>st</sup> | 92.2%        | 19-39 years old                                        | 8-11                        | 19-40                                                                | moderate                                              | none                                                    | none / mild                    | none / mild                                          | normal:<br>METS > 5            |
| <i>A</i> : 12-year-old girl with bronchiectasis: pSOFA 3                 | 2 <sup>nd</sup> | 88.2%        | ≤ 18 years old                                         | ≤ 7 or single organ failure | 19-40                                                                | none / mild                                           | significant                                             | none / mild                    | none / mild                                          | normal:<br>METS > 5            |
| <i>E</i> : 59-year-old man with early dementia: SOFA 2                   | 3 <sup>rd</sup> | 82.4%        | 40-59 years old                                        | ≤ 7 or single organ failure | 19-40                                                                | none / mild                                           | mild                                                    | none / mild                    | moderate / significant                               | normal:<br>METS > 5            |
| <i>B</i> : 38-year-old woman with obesity, diabetes: SOFA 3              | 4 <sup>th</sup> | 79.7%        | 19-39 years old                                        | ≤ 7 or single organ failure | > 50                                                                 | none / mild                                           | none                                                    | none / mild                    | moderate / significant                               | normal:<br>METS > 5            |
| <i>I</i> : 76-year-old woman, MS but in remission: SOFA 3                | 5 <sup>th</sup> | 77.8%        | > 75 years old                                         | ≤ 7 or single organ failure | 19-40                                                                | none / mild                                           | none                                                    | none / mild                    | moderate / significant                               | normal:<br>METS > 5            |
| <i>H</i> : 71-year-old man, usually well but                             | 6 <sup>th</sup> | 76.5%        | 60-75 years old                                        | > 11                        | 19-40                                                                | none / mild                                           | none                                                    | none / mild                    | none / mild                                          | normal:<br>METS > 5            |

|                                                                     |                  |       |                 |                             |       |             |             |                        |                        |                  |
|---------------------------------------------------------------------|------------------|-------|-----------------|-----------------------------|-------|-------------|-------------|------------------------|------------------------|------------------|
| critically ill:<br>SOFA 13                                          |                  |       |                 |                             |       |             |             |                        |                        |                  |
| <i>D</i> : 58-year-old woman undergoing chemotherapy: SOFA 2        | 7 <sup>th</sup>  | 71.2% | 40-59 years old | ≤ 7 or single organ failure | 19-40 | none / mild | mild        | moderate / significant | moderate / significant | normal: METS > 5 |
| <i>F</i> : 64-year-old man with obesity, AAA, moderate COPD: SOFA 4 | 8 <sup>th</sup>  | 64.7% | 60-75 years old | ≤ 7 or single organ failure | 40-50 | significant | moderate    | none / mild            | none / mild            | normal: METS > 5 |
| <i>G</i> : 68-year-old woman with severe COPD: SOFA 6               | 8 <sup>th</sup>  | 64.7% | 60-75 years old | ≤ 7 or single organ failure | 19-40 | none / mild | significant | none / mild            | none / mild            | poor: METS < 5   |
| <i>J</i> : 79-year-old man, multiple medical conditions: SOFA 9     | 10 <sup>th</sup> | 49.7% | > 75 years old  | 8-11                        | 19-40 | moderate    | moderate    | none / mild            | moderate / significant | poor: METS < 5   |
